# Supplementary material
Source: HighWire-hosted journal article supplement (https://ez-admanager.com/highwire/filestream/135913/field_highwire_adjunct_files/0/lee_853.pdf)
Supplement: lee_853.pdf [file lee_853.pdf]

# 조가비핵의 세로토닌성 신경분포

## 파킨슨병의 이상운동증 위험 감시

### Putaminal serotonergic innervation

### Monitoring dyskinesia risk in Parkinson disease

Jee-Young Lee, MD, PhD  
Seongho Seo, MS  
Jae Sung Lee, PhD  
Han-Joon Kim, MD, PhD  
Yu Kyeong Kim, MD, PhD  
Beom S. Jeon, MD, PhD

**목적:** 파킨슨병 환자의 레보도파에 의한 이상운동증과 관련된 기저핵의 세로토닌성 신경분포(serotonergic innervations)를 관찰하기 위해 본 연구를 시행하였다.

**방법:** 본 연구에서는 치매 또는 우울증이 없는 파킨슨병 환자 30명을 3개의 군(이상운동증군, 비-이상운동증군, 약물 비복용군)으로 분류하였고, 각각의 환자들에게 [<sup>11</sup>C]-3-amino-4-(2-dimethylaminomethylphenylsulfanyl)-benzonitrile (11C-DASB)과 N-(3-[<sup>18</sup>F] fluoropropyl)-2-carbomethoxy-3-(4-iodophenyl) nortropine (18F-FP-CIT)를 이용한 두 종류의 PET 영상과 3T MRI를 시행하였다. 기저핵에서 두 종류의 방사성 추적자의 수용체 결합능(Binding potential)과 임상적 요인과의 상관관계를 분석하였다.

**결과:** 꼬리핵과 조가비핵에서 18F-FP-CIT 결합은 이상운동증군과 비-이상운동증군 간 차이가 없었으나, 11C-DASB 결합은 차이가 관찰되었다. 조가비핵의 도파민성 신경 섬유 가용성에 대한 상대적인 세로토닌성 섬유 신경세포의 분포를 나타내는, 수용체 결합비(11C-DASB/18F-FP-CIT)는 이상운동증군이 가장 높았으며, 비이상운동증군과 약물 비복용군 순서로 낮아졌다. 조가비핵과 담창구의 수용체 결합비(11C-DASB/18F-FP-CIT ratios)는 통합파킨슨병척도( Unified Parkinson's Disease Rating Scale, UPDRS) 전체 점수 및 파킨슨병 유병 기간과 양의 상관관계를 보였으며, 담창구 수용체 결합률은 통합파킨슨병척도 운동 점수와 상관관계를 보였다. 수용체 결합비는 기저핵 어떤 부위에서도 도파민성 약물의 용량과는 연관성이 없었다.

**결론:** 꼬리핵과 담창구의 상대적 세로토닌성 신경분포는 파킨슨병의 임상 증상의 진행과 함께 증가하였고, 이상운동이 발생한 환자군에서 가장 높았다. 세로토닌/도파민 전달체 비율은 파킨슨병 환자에서 질병 진행 정도의 지표 및 레보도파에 의해 유발된 이상운동증의 위험인자의 지표가 될 수 있다. 이러한 사실은 향후 전향적 연구로 검증이 필요할 것으로 생각된다.

Neurology® 2015;85:853-860

Figure 1 <sup>11</sup>C-DASB/<sup>18</sup>F-FP-CIT binding potential ratios in the caudate nucleus, putamen, globus pallidus, and thalamus

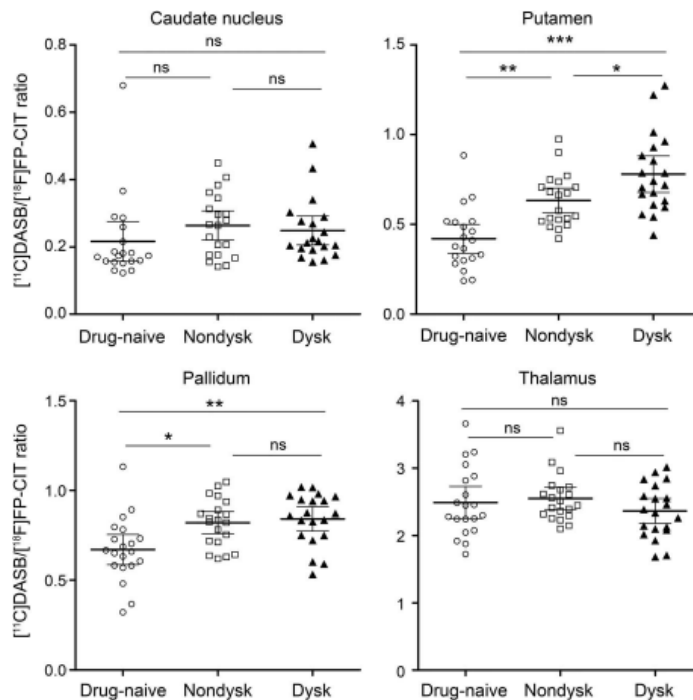

Comparisons of [<sup>11</sup>C]-3-amino-4-(2-dimethylaminomethylphenylsulfanyl)-benzonitrile (<sup>11</sup>C-DASB)/N-(3-[<sup>18</sup>F]fluoropropyl)-2-carbomethoxy-3-(4-iodophenyl) nortropine (<sup>18</sup>F-FP-CIT) binding potential ratios among patients with drug-naive, nondyskinetic (Nondysk), and dyskinetic (Dysk) Parkinson disease. ns = no difference; \*p < 0.05; \*\*p < 0.01; \*\*\*p < 0.001.
